# Supplementary material for: Analysis of Polyphenol Patterns of Pleurotus ostreatus Cultivars by UHPLC-ESI-MS/MS; Application of FT-NIR and Chemometric Methods, Classification Options
Source: MDPI journal article supplement (doi:10.3390/chemosensors12020019), 2024-01-26
Supplement: s1 [file s1]

Archive with 5 entries (5 files):
- S2 Kruskal_Wallis_4-Hydroxibenzoic acid.pdf
- S3 Kruskal_Wallis_Caffeic acid.pdf
- S4 Kruskal_Wallis_p-Coumaric acid.pdf
- S5 Cluster analysis of cultivated Pleurotus ostreatus samples based on amino acid concentrations.pdf
- S1 Spearman correlation matrix.pdf
