# Supplementary material for: Analysis of Polyphenol Patterns of Pleurotus ostreatus Cultivars by UHPLC-ESI-MS/MS; Application of FT-NIR and Chemometric Methods, Classification Options
Source: MDPI journal article supplement (doi:10.3390/chemosensors12020019), 2024-01-26
Supplement: s1 [file s1 › S1 Spearman correlation matrix.pdf]

S1 Spearman correlation matrix

| Variables              | 4-hydroxi-benzoic acid | catechin      | 5-CQA        | vanillic acid | caffeic acid | syringic acid | p-coumaric acid | ferulic acid | rutin        | sinapic acid | ellagic acid  | naringin     | conifer-aldehyde | rosmarinic acid | myricetin    | quercetin    | luteolin     | genistein    | hesperetin   | apigenin     | kaempferol   | isorhamnetin | chrysin      |
|------------------------|------------------------|---------------|--------------|---------------|--------------|---------------|-----------------|--------------|--------------|--------------|---------------|--------------|------------------|-----------------|--------------|--------------|--------------|--------------|--------------|--------------|--------------|--------------|--------------|
| 4-hydroxi-benzoic acid | 1                      |               |              |               |              |               |                 |              |              |              |               |              |                  |                 |              |              |              |              |              |              |              |              |              |
| catechin               | 0.286                  | 1             |              |               |              |               |                 |              |              |              |               |              |                  |                 |              |              |              |              |              |              |              |              |              |
| 5-CQA                  | 0.505                  | <b>0.610</b>  | 1            |               |              |               |                 |              |              |              |               |              |                  |                 |              |              |              |              |              |              |              |              |              |
| vanillic acid          | 0.096                  | <b>-0.620</b> | -0.384       | 1             |              |               |                 |              |              |              |               |              |                  |                 |              |              |              |              |              |              |              |              |              |
| caffeic acid           | 0.279                  | -0.251        | 0.081        | 0.319         | 1            |               |                 |              |              |              |               |              |                  |                 |              |              |              |              |              |              |              |              |              |
| syringic acid          | 0.522                  | 0.401         | <b>0.681</b> | -0.035        | 0.231        | 1             |                 |              |              |              |               |              |                  |                 |              |              |              |              |              |              |              |              |              |
| p-coumaric acid        | <b>0.731</b>           | -0.027        | 0.269        | 0.210         | <b>0.627</b> | <b>0.610</b>  | 1               |              |              |              |               |              |                  |                 |              |              |              |              |              |              |              |              |              |
| ferulic acid           | 0.330                  | <b>0.566</b>  | <b>0.879</b> | -0.559        | 0.123        | <b>0.676</b>  | 0.269           | 1            |              |              |               |              |                  |                 |              |              |              |              |              |              |              |              |              |
| rutin                  | 0.434                  | 0.319         | <b>0.764</b> | -0.079        | 0.170        | <b>0.604</b>  | 0.269           | <b>0.643</b> | 1            |              |               |              |                  |                 |              |              |              |              |              |              |              |              |              |
| sinapic acid           | 0.143                  | 0.016         | 0.352        | 0.175         | -0.215       | 0.165         | -0.011          | 0.115        | 0.231        | 1            |               |              |                  |                 |              |              |              |              |              |              |              |              |              |
| ellagic acid           | 0.022                  | 0.475         | 0.232        | -0.413        | 0.045        | 0.392         | 0.110           | 0.249        | 0.166        | -0.464       | 1             |              |                  |                 |              |              |              |              |              |              |              |              |              |
| naringin               | 0.445                  | 0.462         | <b>0.863</b> | -0.332        | 0.050        | <b>0.736</b>  | 0.313           | <b>0.753</b> | <b>0.599</b> | 0.209        | 0.309         | 1            |                  |                 |              |              |              |              |              |              |              |              |              |
| conifer-aldehyde       | 0.192                  | 0.330         | <b>0.643</b> | -0.332        | 0.000        | <b>0.593</b>  | 0.132           | <b>0.577</b> | <b>0.747</b> | -0.132       | <b>0.635</b>  | <b>0.720</b> | 1                |                 |              |              |              |              |              |              |              |              |              |
| rosmarinic acid        | 0.308                  | 0.291         | <b>0.764</b> | -0.323        | 0.078        | <b>0.681</b>  | 0.247           | <b>0.769</b> | <b>0.868</b> | 0.027        | 0.381         | <b>0.764</b> | <b>0.918</b>     | 1               |              |              |              |              |              |              |              |              |              |
| myricetin              | 0.258                  | 0.434         | <b>0.764</b> | -0.446        | -0.039       | 0.231         | -0.055          | <b>0.709</b> | <b>0.758</b> | 0.225        | -0.017        | <b>0.577</b> | 0.533            | <b>0.698</b>    | 1            |              |              |              |              |              |              |              |              |
| quercetin              | 0.236                  | 0.176         | <b>0.720</b> | -0.096        | 0.153        | 0.527         | 0.181           | <b>0.643</b> | <b>0.912</b> | 0.099        | 0.166         | <b>0.665</b> | <b>0.813</b>     | <b>0.901</b>    | <b>0.758</b> | 1            |              |              |              |              |              |              |              |
| luteolin               | <b>0.610</b>           | 0.319         | <b>0.599</b> | 0.201         | 0.390        | 0.423         | 0.357           | 0.429        | 0.451        | 0.313        | -0.298        | 0.511        | 0.038            | 0.220           | 0.451        | 0.363        | 1            |              |              |              |              |              |              |
| genistein              | 0.434                  | 0.445         | <b>0.786</b> | -0.035        | 0.067        | 0.473         | 0.088           | 0.538        | <b>0.874</b> | 0.467        | 0.039         | <b>0.599</b> | 0.544            | <b>0.648</b>    | <b>0.797</b> | <b>0.742</b> | <b>0.637</b> | 1            |              |              |              |              |              |
| hesperetin             | 0.148                  | 0.324         | 0.423        | -0.017        | <b>0.638</b> | 0.385         | 0.269           | 0.330        | 0.555        | -0.038       | 0.370         | 0.291        | 0.401            | 0.368           | 0.308        | 0.445        | 0.418        | 0.538        | 1            |              |              |              |              |
| apigenin               | <b>0.632</b>           | 0.308         | <b>0.797</b> | 0.096         | 0.449        | <b>0.698</b>  | 0.527           | <b>0.659</b> | <b>0.753</b> | 0.429        | -0.110        | <b>0.681</b> | 0.363            | <b>0.577</b>    | <b>0.588</b> | <b>0.643</b> | <b>0.863</b> | <b>0.791</b> | <b>0.571</b> | 1            |              |              |              |
| kaempferol             | 0.489                  | 0.033         | <b>0.560</b> | 0.463         | 0.429        | <b>0.615</b>  | 0.385           | 0.297        | <b>0.582</b> | 0.324        | 0.083         | <b>0.582</b> | 0.423            | 0.462           | 0.280        | 0.549        | <b>0.665</b> | <b>0.676</b> | 0.467        | <b>0.753</b> | 1            |              |              |
| isorhamnetin           | 0.346                  | 0.187         | <b>0.753</b> | -0.035        | 0.343        | 0.527         | 0.291           | <b>0.709</b> | <b>0.907</b> | 0.313        | -0.022        | 0.527        | 0.549            | <b>0.769</b>    | <b>0.797</b> | <b>0.863</b> | 0.527        | <b>0.824</b> | 0.533        | <b>0.808</b> | <b>0.593</b> | 1            |              |
| chrysin                | 0.445                  | 0.324         | <b>0.758</b> | -0.070        | 0.334        | <b>0.637</b>  | 0.379           | <b>0.709</b> | <b>0.956</b> | 0.209        | 0.077         | 0.555        | <b>0.615</b>     | <b>0.797</b>    | <b>0.714</b> | <b>0.857</b> | 0.555        | <b>0.808</b> | <b>0.637</b> | <b>0.835</b> | 0.544        | <b>0.929</b> | 1            |
| TPC                    | -0.038                 | 0.220         | 0.429        | 0.087         | -0.223       | -0.038        | -0.363          | 0.192        | 0.462        | 0.473        | -0.193        | 0.214        | 0.181            | 0.231           | <b>0.643</b> | 0.495        | 0.368        | <b>0.709</b> | 0.143        | 0.346        | 0.407        | 0.544        | 0.363        |
| FRAP                   | 0.159                  | 0.319         | 0.368        | -0.183        | -0.295       | -0.016        | -0.093          | 0.209        | 0.396        | -0.104       | 0.122         | 0.302        | 0.418            | 0.346           | 0.538        | 0.549        | 0.137        | 0.374        | -0.033       | 0.104        | 0.077        | 0.291        | 0.286        |
| Asp                    | 0.148                  | 0.445         | 0.209        | -0.280        | 0.304        | -0.242        | -0.104          | 0.176        | 0.093        | -0.374       | 0.182         | -0.066       | -0.027           | -0.071          | 0.330        | 0.038        | 0.330        | 0.198        | 0.440        | 0.115        | -0.022       | 0.143        | 0.165        |
| Thr                    | -0.280                 | -0.511        | -0.368       | 0.288         | 0.485        | -0.522        | 0.049           | -0.352       | -0.264       | -0.181       | -0.398        | -0.352       | -0.385           | -0.379          | -0.104       | -0.066       | 0.044        | -0.275       | 0.137        | -0.104       | -0.143       | -0.060       | -0.148       |
| Ser                    | 0.181                  | 0.390         | 0.198        | -0.026        | 0.398        | -0.099        | 0.055           | 0.121        | 0.346        | -0.115       | -0.006        | -0.121       | -0.049           | -0.016          | 0.396        | 0.203        | 0.462        | 0.440        | <b>0.670</b> | 0.357        | 0.099        | 0.385        | 0.451        |
| Asn                    | 0.181                  | 0.341         | 0.176        | 0.035         | 0.476        | -0.011        | 0.143           | 0.099        | 0.396        | -0.198       | 0.138         | -0.132       | 0.060            | 0.049           | 0.297        | 0.253        | 0.368        | 0.401        | <b>0.753</b> | 0.335        | 0.143        | 0.390        | 0.495        |
| Glu                    | 0.198                  | -0.088        | 0.082        | -0.192        | -0.226       | 0.363         | 0.313           | 0.203        | 0.209        | -0.099       | 0.033         | 0.330        | 0.385            | 0.440           | 0.005        | 0.264        | -0.187       | -0.121       | -0.264       | 0.033        | -0.170       | 0.000        | 0.181        |
| Gln                    | 0.505                  | 0.264         | 0.099        | 0.157         | 0.507        | 0.473         | <b>0.692</b>    | 0.176        | 0.143        | 0.027        | 0.006         | 0.016        | -0.198           | -0.049          | -0.088       | -0.099       | 0.440        | 0.132        | 0.418        | 0.473        | 0.176        | 0.187        | 0.324        |
| Pro                    | 0.104                  | 0.412         | 0.335        | -0.332        | 0.131        | -0.126        | -0.005          | 0.291        | 0.396        | -0.258       | 0.171         | 0.071        | 0.253            | 0.231           | <b>0.566</b> | 0.440        | 0.192        | 0.346        | 0.401        | 0.176        | -0.077       | 0.396        | 0.423        |
| Gly                    | 0.181                  | 0.269         | -0.005       | -0.087        | 0.359        | -0.148        | 0.099           | 0.038        | 0.236        | -0.555       | 0.243         | -0.286       | 0.060            | 0.022           | 0.181        | 0.126        | 0.104        | 0.115        | 0.467        | 0.033        | -0.115       | 0.187        | 0.308        |
| Ala                    | 0.302                  | 0.220         | 0.203        | -0.026        | 0.426        | 0.011         | 0.258           | 0.214        | 0.484        | -0.269       | 0.122         | -0.165       | 0.143            | 0.209           | 0.379        | 0.352        | 0.214        | 0.341        | 0.522        | 0.280        | 0.055        | 0.500        | <b>0.560</b> |
| Val                    | -0.148                 | 0.401         | 0.176        | -0.271        | 0.184        | -0.082        | -0.198          | 0.187        | 0.451        | -0.275       | 0.343         | -0.088       | 0.308            | 0.253           | 0.478        | 0.374        | 0.038        | 0.429        | <b>0.665</b> | 0.115        | -0.033       | 0.418        | 0.456        |
| Cys                    | 0.191                  | 0.257         | 0.309        | -0.418        | -0.142       | -0.251        | -0.078          | 0.272        | 0.214        | 0.231        | -0.317        | 0.165        | -0.046           | 0.113           | <b>0.717</b> | 0.208        | 0.275        | 0.387        | -0.058       | 0.220        | -0.153       | 0.332        | 0.196        |
| Met                    | 0.110                  | 0.154         | -0.005       | 0.131         | 0.468        | -0.247        | 0.005           | -0.055       | 0.198        | -0.126       | -0.110        | -0.286       | -0.209           | -0.154          | 0.308        | 0.055        | 0.390        | 0.352        | 0.555        | 0.247        | 0.121        | 0.319        | 0.280        |
| Ciszt                  | 0.005                  | -0.335        | -0.055       | 0.367         | 0.028        | -0.396        | -0.115          | -0.192       | 0.236        | 0.341        | <b>-0.713</b> | -0.313       | -0.264           | -0.115          | 0.253        | 0.225        | 0.225        | 0.236        | 0.000        | 0.170        | -0.011       | 0.308        | 0.275        |
| Ile                    | 0.005                  | 0.379         | 0.099        | -0.393        | 0.209        | -0.275        | -0.170          | 0.176        | 0.209        | -0.434       | 0.276         | -0.214       | 0.088            | 0.071           | 0.418        | 0.110        | 0.022        | 0.209        | 0.418        | -0.027       | -0.203       | 0.242        | 0.236        |
| Leu                    | -0.016                 | 0.198         | -0.033       | -0.157        | 0.345        | -0.302        | -0.104          | 0.027        | 0.220        | -0.346       | 0.105         | -0.313       | -0.027           | -0.005          | 0.374        | 0.099        | 0.093        | 0.253        | 0.495        | 0.044        | -0.115       | 0.291        | 0.264        |
| Tyr                    | 0.060                  | 0.330         | 0.082        | -0.087        | 0.365        | -0.077        | 0.022           | 0.115        | 0.374        | -0.319       | 0.204         | -0.253       | 0.082            | 0.088           | 0.319        | 0.220        | 0.159        | 0.324        | <b>0.643</b> | 0.170        | -0.027       | 0.374        | 0.451        |
| Phe                    | 0.033                  | 0.313         | 0.104        | -0.087        | 0.298        | -0.082        | -0.132          | 0.099        | 0.429        | -0.236       | 0.182         | -0.170       | 0.154            | 0.159           | 0.407        | 0.242        | 0.203        | 0.462        | <b>0.659</b> | 0.209        | 0.082        | 0.401        | 0.451        |
| GABA                   | 0.165                  | 0.236         | 0.060        | -0.166        | -0.022       | -0.500        | -0.253          | -0.066       | -0.038       | -0.247       | -0.210        | -0.077       | -0.170           | -0.203          | 0.341        | -0.005       | 0.346        | 0.126        | 0.022        | -0.005       | -0.137       | -0.044       | -0.033       |
| Ornitin                | <b>0.637</b>           | 0.000         | 0.104        | -0.009        | 0.184        | 0.505         | <b>0.742</b>    | 0.187        | 0.110        | -0.088       | 0.094         | 0.203        | 0.115            | 0.209           | -0.225       | -0.033       | 0.055        | -0.159       | -0.088       | 0.214        | 0.011        | -0.033       | 0.176        |
| Lys                    | -0.027                 | 0.412         | 0.170        | -0.070        | 0.270        | 0.121         | -0.110          | 0.143        | 0.418        | -0.060       | 0.182         | -0.055       | 0.154            | 0.143           | 0.236        | 0.198        | 0.280        | 0.445        | <b>0.791</b> | 0.319        | 0.121        | 0.324        | 0.495        |
| His                    | 0.027                  | 0.198         | -0.044       | -0.026        | 0.368        | -0.258        | -0.049          | -0.060       | 0.269        | -0.335       | 0.028         | -0.236       | -0.005           | -0.016          | 0.341        | 0.170        | 0.242        | 0.308        | <b>0.593</b> | 0.143        | -0.038       | 0.264        | 0.324        |
| m-His                  | 0.297                  | 0.236         | 0.005        | 0.044         | 0.451        | -0.011        | 0.269           | 0.011        | 0.352        | -0.269       | 0.116         | -0.269       | -0.005           | 0.033           | 0.214        | 0.121        | 0.220        | 0.297        | <b>0.599</b> | 0.236        | 0.011        | 0.319        | 0.434        |
| Arg                    | 0.165                  | 0.341         | 0.198        | -0.070        | 0.340        | -0.071        | -0.027          | 0.115        | 0.423        | -0.005       | -0.066        | -0.033       | 0.027            | 0.088           | 0.473        | 0.225        | 0.467        | 0.549        | <b>0.698</b> | 0.412        | 0.132        | 0.412        | 0.489        |
| Total free AA          | 0.264                  | 0.302         | 0.159        | -0.009        | 0.365        | 0.088         | 0.203           | 0.181        | 0.533        | -0.236       | 0.066         | -0.132       | 0.143            | 0.220           | 0.379        | 0.346        | 0.302        | 0.423        | <b>0.621</b> | 0.352        | 0.049        | 0.478        | <b>0.621</b> |
