# Supplementary material for: Analysis of Polyphenol Patterns of Pleurotus ostreatus Cultivars by UHPLC-ESI-MS/MS; Application of FT-NIR and Chemometric Methods, Classification Options
Source: MDPI journal article supplement (doi:10.3390/chemosensors12020019), 2024-01-26
Supplement: s1 [file s1 › S2 Kruskal_Wallis_4-Hydroxibenzoic acid.pdf]

## S2 Kruskal-Wallis test – 4-Hydroxibenzoic acid

| Variable         | Minimum | Maximum | Mean    | Std. deviation |
|------------------|---------|---------|---------|----------------|
| 1 <sup>st</sup>  | 10.1438 | 11.5569 | 10.6174 | 0.81366        |
| 2 <sup>nd</sup>  | 88.8745 | 113.622 | 98.23   | 13.4327        |
| 3 <sup>rd</sup>  | 32.3966 | 34.4812 | 33.0915 | 1.20353        |
| 4 <sup>th</sup>  | 26.1391 | 26.9596 | 26.4443 | 0.44882        |
| 5 <sup>th</sup>  | 21.1912 | 23.1878 | 22.4886 | 1.12475        |
| 6 <sup>th</sup>  | 17.5876 | 17.8418 | 17.7236 | 0.12804        |
| 7 <sup>th</sup>  | 11.709  | 12.5199 | 12.0886 | 0.40789        |
| 8 <sup>th</sup>  | 26.3916 | 29.6405 | 27.8966 | 1.63756        |
| 9 <sup>th</sup>  | 23.5673 | 25.006  | 24.4569 | 0.77744        |
| 10 <sup>th</sup> | 19.1216 | 20.5349 | 19.9902 | 0.76028        |
| 12 <sup>th</sup> | 11.298  | 11.8518 | 11.6159 | 0.28585        |
| 13 <sup>th</sup> | 21.564  | 22.8047 | 22.1849 | 0.62034        |
| 14 <sup>th</sup> | 23.3476 | 25.0267 | 23.9385 | 0.94356        |

| Sample           | Sum of ranks | Mean of ranks | Groups |   |   |   |   |   |   |   |   |   |   |
|------------------|--------------|---------------|--------|---|---|---|---|---|---|---|---|---|---|
| 2 <sup>nd</sup>  | 114.000      | 38.000        | A      |   |   |   |   |   |   |   |   |   |   |
| 3 <sup>rd</sup>  | 105.000      | 35.000        | A      | B |   |   |   |   |   |   |   |   |   |
| 8 <sup>th</sup>  | 95.000       | 31.667        |        | B | C |   |   |   |   |   |   |   |   |
| 4 <sup>th</sup>  | 88.000       | 29.333        |        |   | C | D |   |   |   |   |   |   |   |
| 9 <sup>th</sup>  | 75.000       | 25.000        |        |   |   | D | E |   |   |   |   |   |   |
| 14 <sup>th</sup> | 72.000       | 24.000        |        |   |   |   | E | F |   |   |   |   |   |
| 5 <sup>th</sup>  | 57.000       | 19.000        |        |   |   |   |   | F | G |   |   |   |   |
| 13 <sup>th</sup> | 54.000       | 18.000        |        |   |   |   |   |   | G |   |   |   |   |
| 10 <sup>th</sup> | 42.000       | 14.000        |        |   |   |   |   |   | G | H |   |   |   |
| 6 <sup>th</sup>  | 33.000       | 11.000        |        |   |   |   |   |   |   | H | I |   |   |
| 7 <sup>th</sup>  | 23.000       | 7.667         |        |   |   |   |   |   |   |   | I | J |   |
| 12 <sup>th</sup> | 15.000       | 5.000         |        |   |   |   |   |   |   |   |   | J | K |
| 1 <sup>st</sup>  | 7.000        | 2.333         |        |   |   |   |   |   |   |   |   |   | K |

|                 | 1 <sup>st</sup> | 2 <sup>nd</sup> | 3 <sup>rd</sup> | 4 <sup>th</sup> | 5 <sup>th</sup> | 6 <sup>th</sup> | 7 <sup>th</sup> | 8 <sup>th</sup> | 9 <sup>th</sup> | 10 <sup>th</sup> | 12 <sup>th</sup> | 13 <sup>th</sup> | 14 <sup>th</sup> |
|-----------------|-----------------|-----------------|-----------------|-----------------|-----------------|-----------------|-----------------|-----------------|-----------------|------------------|------------------|------------------|------------------|
| 1 <sup>st</sup> | No              | Yes              | No               | Yes              | Yes              |
| 2 <sup>nd</sup> | Yes             | No              | No              | Yes              | Yes              | Yes              | Yes              |
| 3 <sup>rd</sup> | Yes             | No              | No              | Yes             | Yes             | Yes             | Yes             | No              | Yes             | Yes              | Yes              | Yes              | Yes              |
| 4 <sup>th</sup> | Yes             | Yes             | Yes             | No              | Yes             | Yes             | Yes             | No              | No              | Yes              | Yes              | Yes              | Yes              |
| 5 <sup>th</sup> | Yes             | Yes             | Yes             | Yes             | No              | Yes             | Yes             | Yes             | Yes             | No               | Yes              | No               | No               |
| 6 <sup>th</sup> | Yes             | Yes             | Yes             | Yes             | Yes             | No              | No              | Yes             | Yes             | No               | Yes              | Yes              | Yes              |
| 7 <sup>th</sup> | Yes             | Yes             | Yes             | Yes             | Yes             | No              | No              | Yes             | Yes             | Yes              | No               | Yes              | Yes              |
| 8 <sup>th</sup> | Yes             | Yes             | No              | No              | Yes             | Yes             | Yes             | No              | Yes             | Yes              | Yes              | Yes              | Yes              |

|                  |     |     |     |     |     |     |     |     |     |     |     |     |     |
|------------------|-----|-----|-----|-----|-----|-----|-----|-----|-----|-----|-----|-----|-----|
| 9 <sup>th</sup>  | Yes | Yes | Yes | No  | Yes | Yes | Yes | Yes | No  | Yes | Yes | Yes | No  |
| 10 <sup>th</sup> | Yes | Yes | Yes | Yes | No  | No  | Yes | Yes | Yes | No  | Yes | No  | Yes |
| 12 <sup>th</sup> | No  | Yes | Yes | Yes | Yes | Yes | No  | Yes | Yes | Yes | No  | Yes | Yes |
| 13 <sup>th</sup> | Yes | Yes | Yes | Yes | No  | Yes | Yes | Yes | Yes | No  | Yes | No  | Yes |
| 14 <sup>th</sup> | Yes | Yes | Yes | Yes | No  | Yes | Yes | Yes | No  | Yes | Yes | Yes | No  |
