# Supplementary material for: Analysis of Polyphenol Patterns of Pleurotus ostreatus Cultivars by UHPLC-ESI-MS/MS; Application of FT-NIR and Chemometric Methods, Classification Options
Source: MDPI journal article supplement (doi:10.3390/chemosensors12020019), 2024-01-26
Supplement: s1 [file s1 › S3 Kruskal_Wallis_Caffeic acid.pdf]

### S3 Kruskal-Wallis test – Caffeic acid

| Variable         | Minimum | Maximum | Mean    | Std. deviation |
|------------------|---------|---------|---------|----------------|
| 1 <sup>st</sup>  | 0.57564 | 0.60325 | 0.59405 | 0.01594        |
| 2 <sup>nd</sup>  | 0.88641 | 1.05098 | 0.99612 | 0.09502        |
| 3 <sup>rd</sup>  | 1.15536 | 1.91623 | 1.40898 | 0.43929        |
| 4 <sup>th</sup>  | 0.13973 | 0.15128 | 0.14358 | 0.00667        |
| 5 <sup>th</sup>  | 0.09491 | 0.10883 | 0.09955 | 0.00803        |
| 6 <sup>th</sup>  | 0.00333 | 1.25686 | 0.42535 | 0.72014        |
| 7 <sup>th</sup>  | 0.02851 | 0.04683 | 0.04072 | 0.01058        |
| 8 <sup>th</sup>  | 0.00482 | 0.92391 | 0.3378  | 0.50915        |
| 9 <sup>th</sup>  | 0.00627 | 0.94003 | 0.33139 | 0.52751        |
| 10 <sup>th</sup> | 0.3265  | 0.35765 | 0.34726 | 0.01798        |
| 12 <sup>th</sup> | 0.00676 | 1.19037 | 0.40361 | 0.68136        |
| 13 <sup>th</sup> | 0.00348 | 0.00562 | 0.0049  | 0.00124        |
| 14 <sup>th</sup> | 0.22065 | 0.25578 | 0.23236 | 0.02028        |

| Sample           | Sum of ranks | Mean of ranks | Groups |   |
|------------------|--------------|---------------|--------|---|
| 3 <sup>rd</sup>  | 110          | 36.6667       | A      |   |
| 2 <sup>nd</sup>  | 97           | 32.3333       | A      |   |
| 1 <sup>st</sup>  | 84           | 28            | A      | B |
| 10 <sup>th</sup> | 75           | 25            | A      | B |
| 14 <sup>th</sup> | 66           | 22            | A      | B |
| 4 <sup>th</sup>  | 57           | 19            | A      | B |
| 12 <sup>th</sup> | 52           | 17.3333       | A      | B |
| 9 <sup>th</sup>  | 51           | 17            | A      | B |
| 5 <sup>th</sup>  | 48           | 16            | A      | B |
| 6 <sup>th</sup>  | 48           | 16            | A      | B |
| 8 <sup>th</sup>  | 48           | 16            | A      | B |
| 7 <sup>th</sup>  | 33           | 11            | A      | B |
| 13 <sup>th</sup> | 11           | 3.66667       | B      |   |

[illegible]

[illegible]
