# Supplementary material for: Analysis of Polyphenol Patterns of Pleurotus ostreatus Cultivars by UHPLC-ESI-MS/MS; Application of FT-NIR and Chemometric Methods, Classification Options
Source: MDPI journal article supplement (doi:10.3390/chemosensors12020019), 2024-01-26
Supplement: s1 [file s1 › S4 Kruskal_Wallis_p-Coumaric acid.pdf]

#### S4 Kruskal-Wallis test – p-Coumaric acid

| Variable         | Minimum | Maximum | Mean   | Std.<br>deviation |
|------------------|---------|---------|--------|-------------------|
| 1 <sup>st</sup>  | 5.828   | 6.006   | 5.925  | 0.090             |
| 2 <sup>nd</sup>  | 38.906  | 39.360  | 39.057 | 0.262             |
| 3 <sup>rd</sup>  | 49.805  | 51.008  | 50.206 | 0.695             |
| 4 <sup>th</sup>  | 11.053  | 11.999  | 11.439 | 0.497             |
| 5 <sup>th</sup>  | 5.761   | 7.334   | 6.475  | 0.796             |
| 6 <sup>th</sup>  | 2.433   | 3.401   | 2.801  | 0.524             |
| 7 <sup>th</sup>  | 5.126   | 6.130   | 5.596  | 0.506             |
| 8 <sup>th</sup>  | 37.299  | 39.396  | 38.264 | 1.059             |
| 9 <sup>th</sup>  | 3.564   | 5.011   | 4.060  | 0.824             |
| 10 <sup>th</sup> | 17.634  | 18.539  | 18.076 | 0.453             |
| 12 <sup>th</sup> | 2.999   | 3.972   | 3.410  | 0.503             |
| 13 <sup>th</sup> | 6.990   | 8.223   | 7.433  | 0.686             |
| 14 <sup>th</sup> | 5.446   | 6.945   | 6.031  | 0.802             |

| Sample           | Sum of<br>ranks | Mean of<br>ranks | Groups |   |
|------------------|-----------------|------------------|--------|---|
| 3 <sup>rd</sup>  | 114.000         | 38.000           | A      |   |
| 2 <sup>nd</sup>  | 102.000         | 34.000           | A B    |   |
| 8 <sup>th</sup>  | 99.000          | 33.000           | A B    |   |
| 10 <sup>th</sup> | 87.000          | 29.000           | B C    |   |
| 4 <sup>th</sup>  | 78.000          | 26.000           | B C D  |   |
| 13 <sup>th</sup> | 67.000          | 22.333           | C D E  |   |
| 5 <sup>th</sup>  | 56.000          | 18.667           | D E F  |   |
| 1 <sup>st</sup>  | 48.000          | 16.000           | E F    |   |
| 14 <sup>th</sup> | 44.000          | 14.667           | E F G  |   |
| 7 <sup>th</sup>  | 40.000          | 13.333           | F G    |   |
| 9 <sup>th</sup>  | 22.000          | 7.333            | G H    |   |
| 12 <sup>th</sup> | 15.000          | 5.000            |        | H |
| 6 <sup>th</sup>  | 8.000           | 2.667            |        | H |

|                 | 1 <sup>st</sup> | 2 <sup>nd</sup> | 3 <sup>rd</sup> | 4 <sup>th</sup> | 5 <sup>th</sup> | 6 <sup>th</sup> | 7 <sup>th</sup> | 8 <sup>th</sup> | 9 <sup>th</sup> | 10 <sup>th</sup> | 12 <sup>th</sup> | 13 <sup>th</sup> | 14 <sup>th</sup> |
|-----------------|-----------------|-----------------|-----------------|-----------------|-----------------|-----------------|-----------------|-----------------|-----------------|------------------|------------------|------------------|------------------|
| 1 <sup>st</sup> | No              | Yes             | Yes             | Yes             | No              | Yes             | No              | Yes             | Yes             | Yes              | Yes              | No               | No               |
| 2 <sup>nd</sup> | Yes             | No              | No              | No              | Yes             | Yes             | Yes             | No              | Yes             | No               | Yes              | Yes              | Yes              |
| 3 <sup>rd</sup> | Yes             | No              | No              | Yes             | Yes             | Yes             | Yes             | No              | Yes             | Yes              | Yes              | Yes              | Yes              |
| 4 <sup>th</sup> | Yes             | No              | Yes             | No              | No              | Yes             | Yes             | No              | Yes             | No               | Yes              | No               | Yes              |
| 5 <sup>th</sup> | No              | Yes             | Yes             | No              | No              | Yes             | No              | Yes             | Yes             | Yes              | Yes              | No               | No               |
| 6 <sup>th</sup> | Yes             | Yes             | Yes             | Yes             | Yes             | No              | Yes             | Yes             | No              | Yes              | No               | Yes              | Yes              |
| 7 <sup>th</sup> | No              | Yes             | Yes             | Yes             | No              | Yes             | No              | Yes             | No              | Yes              | Yes              | Yes              | No               |
| 8 <sup>th</sup> | Yes             | No              | No              | No              | Yes             | Yes             | Yes             | No              | Yes             | No               | Yes              | Yes              | Yes              |

|                  |     |     |     |     |     |     |     |     |     |     |     |     |     |
|------------------|-----|-----|-----|-----|-----|-----|-----|-----|-----|-----|-----|-----|-----|
| 9 <sup>th</sup>  | Yes | Yes | Yes | Yes | Yes | No  | No  | Yes | No  | Yes | No  | Yes | No  |
| 10 <sup>th</sup> | Yes | No  | Yes | No  | Yes | Yes | Yes | No  | Yes | No  | Yes | No  | Yes |
| 12 <sup>th</sup> | Yes | Yes | Yes | Yes | Yes | No  | Yes | Yes | No  | Yes | No  | Yes | Yes |
| 13 <sup>th</sup> | No  | Yes | Yes | No  | No  | Yes | Yes | Yes | Yes | No  | Yes | No  | No  |
| 14 <sup>th</sup> | No  | Yes | Yes | Yes | No  | Yes | No  | Yes | No  | Yes | Yes | No  | No  |
