# Supplementary material for: Analysis of Polyphenol Patterns of Pleurotus ostreatus Cultivars by UHPLC-ESI-MS/MS; Application of FT-NIR and Chemometric Methods, Classification Options
Source: MDPI journal article supplement (doi:10.3390/chemosensors12020019), 2024-01-26

S5 Cluster analysis of cultivated *Pleurotus ostreatus* samples based on amino acid concentrations

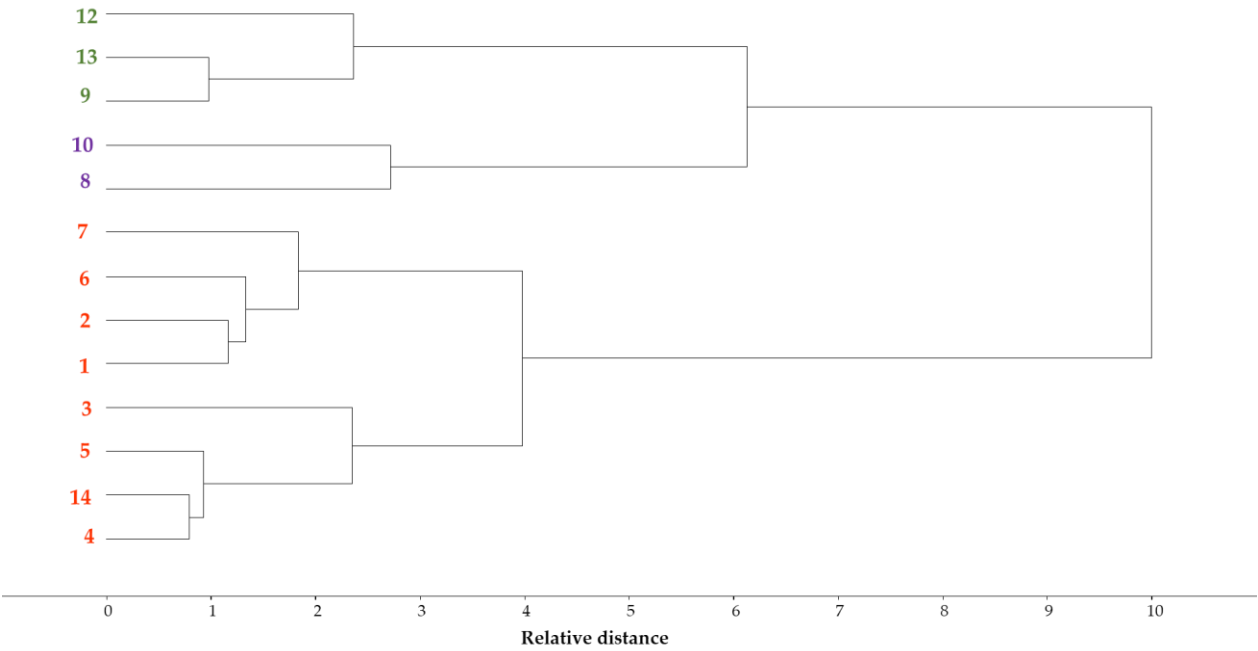

Supplement: s1 [file s1 › S5 Cluster analysis of cultivated Pleurotus ostreatus samples based on amino acid concentrations.pdf]
